# Supplementary material for: Bromine anion mediated epitaxial growth of core–shell Pd@Ag towards efficient electrochemical CO2 reduction
Source: Royal Society of Chemistry journal article supplement (doi:10.1039/d1qm00169h), 2021-01-01
Supplement: d1qm00169h1.pdf [file d1qm00169h1.pdf]

Electronic supplementary information (ESI) for Materials Chemistry Frontiers

This journal is © The Royal Society of Chemistry

## Bromine anion mediated epitaxy growth of core-shell Pd@Ag towards efficient electrochemical CO<sub>2</sub> reduction

Yinqiong Wu,<sup>#a</sup> Jiachang Zeng,<sup>#a</sup> Yang Yang,<sup>a</sup> Zhaojie Li,<sup>a</sup> Wenbiao Zhang,<sup>a</sup> Dan Li,<sup>a</sup> and Qingsheng Gao<sup>\*a</sup>

<sup>a</sup> College of Chemistry and Materials Science, and Guangdong Provincial Key Laboratory of Functional Supramolecular Coordination Materials and Applications, Jinan University, Guangzhou 510632, P. R. China. Email: tqsgao@jnu.edu.cn.

<sup>#</sup> These authors contribute equally to this work.

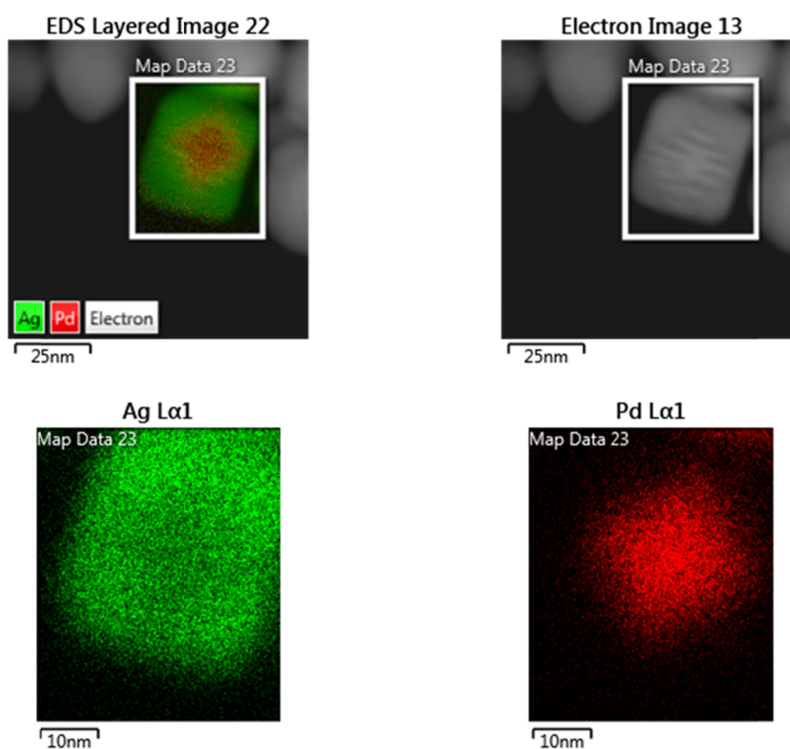

**Fig. S1** Raw data of the elemental mapping of Pd@Ag cubes corresponding to Fig. 1e in manuscript.

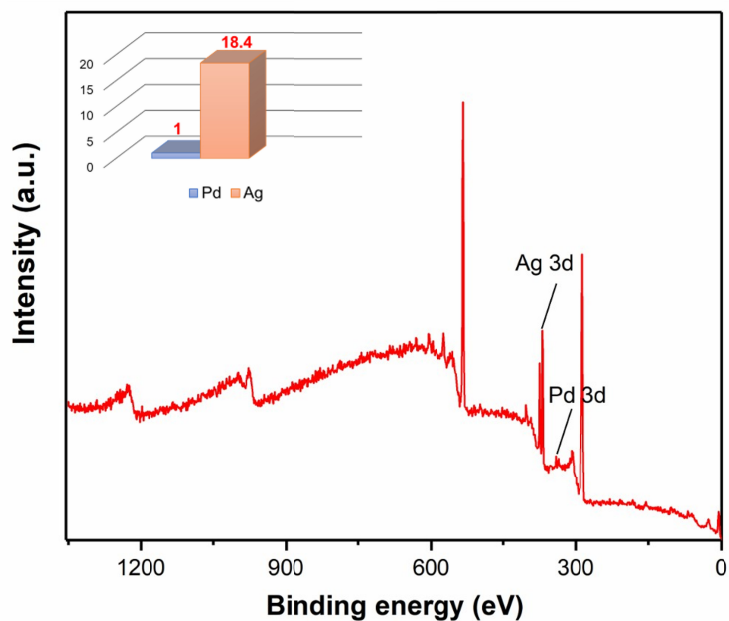

**Fig. S2** XPS survey spectra of Pd@Ag that identifies the atomic ratio of Pd to Ag as 1:18.4.

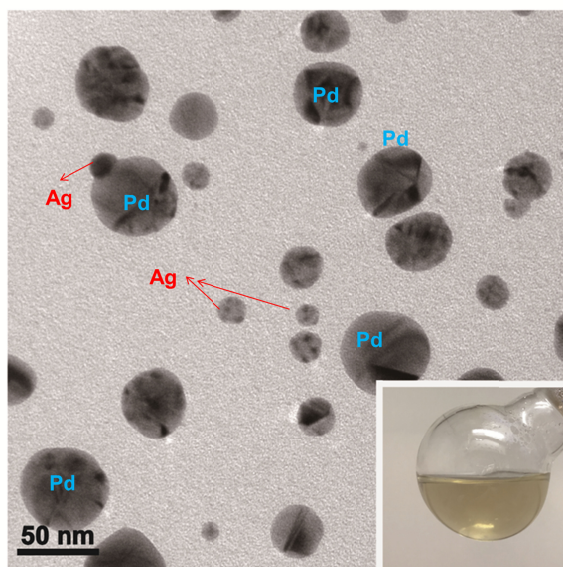

**Fig. S3** TEM image of the sample obtained with excessive CTAB (1.0 mmol L<sup>-1</sup>). Inset panel is the picture of the solution after reaction, and the yellow-brown colour indicates the formation of nanosized Ag that corresponds to the small particles observed in TEM. Although some particles are observed on Pd Octs, the undefined growth cannot result in a uniform shell on a Pd core.

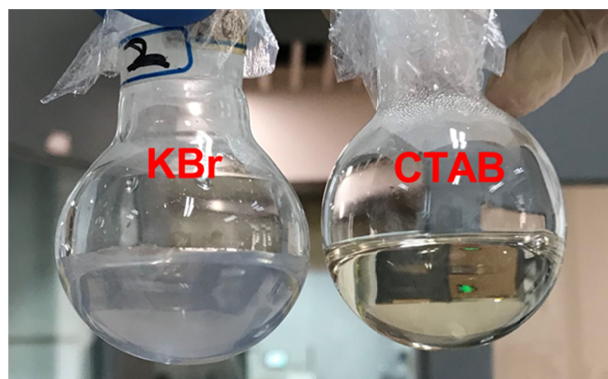

**Fig. S4** Digital photos of the initial solutions in control experiments that use KBr and CTAB to fabricate Pd@Ag, respectively. Obviously, without the protection by CTA<sup>+</sup> chains, the free Br<sup>-</sup> in solution easily reacts with Ag<sup>+</sup> quickly, generating white colloid precipitates that prohibit the further reactions towards well-defined Pd@Ag.

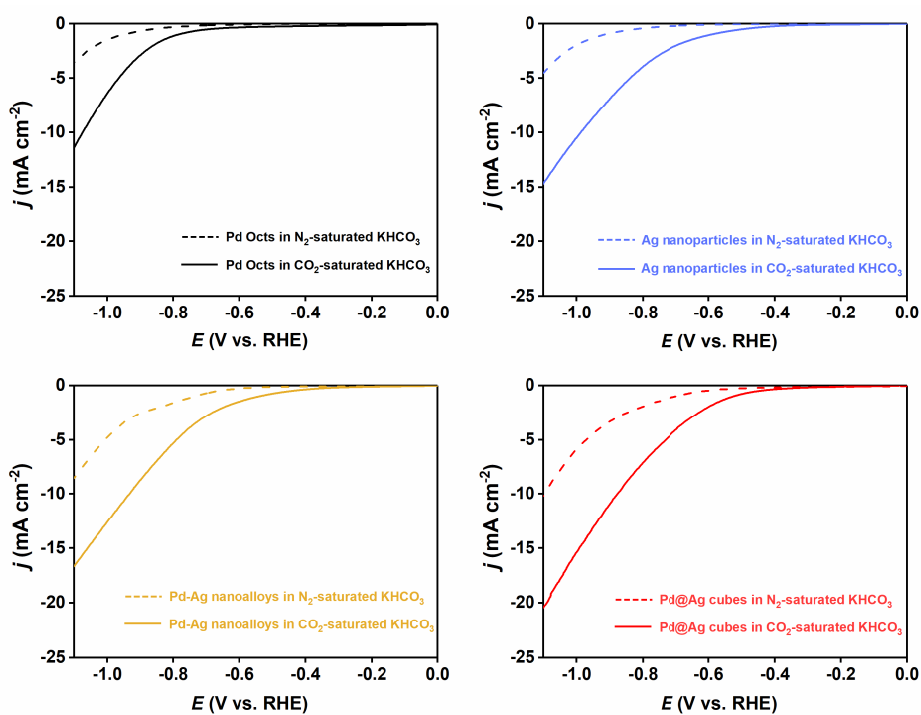

**Fig. S5** Polarization curves of carbon supported Pd Octs, Ag nanoparticles, Pd-Ag nanoalloys and Pd@Ag in CO<sub>2</sub>-saturated and N<sub>2</sub>-saturated 0.5 M KHCO<sub>3</sub> electrolytes.
